1                   **Colonizations drive host shifts, diversification of preferences and expansion of**  
2                                           **herbivore diet breadth**

3  
4                                           Michael C Singer<sup>1,2\*</sup> and Camille Parmesan<sup>1,2,3</sup>

5  
6  
7     <sup>1</sup>Station d'Écologie Théorique et Expérimentale, UMR 5321, CNRS, Univ. Paul Sabatier, F-  
8     09200 Moulis, France

9     <sup>2</sup>Biological and Marine Sciences, University of Plymouth, Drake Circus PL4 8AA, UK

10    <sup>3</sup>Dept. of Geological Sciences, University of Texas at Austin, Austin, Texas 78712, USA

11    \*Corresponding author [michael.singer@sete.cnrs.fr](mailto:michael.singer@sete.cnrs.fr)

12

13

14 ABSTRACT.

15

16 Dynamics of herbivorous insect diet breadth are important in generation of novel pests,  
17 biological control of weeds and as indicators of global change impacts. But what forces and  
18 events drive these dynamics? Here we present evidence for a novel scenario: that specialization  
19 increases in persistent populations, but that, at the species level, this trend is countered by effects  
20 of colonizations. Colonizations cause host shifts, which are followed by non-adaptive  
21 evolutionary expansions of diet breadth, adding transitory hosts during adaptation to the  
22 principal novel host.

23

24 We base this thesis on long-term study of 15 independently-evolving populations of Edith's  
25 Checkerspot butterfly, eight of which used fewer host genera in recent censuses than in the  
26 1980's, while none used more - a significant increase in specialization. At the same time, two  
27 extinction/recolonization events were followed by temporary expansions of diet breadth.  
28 Behavioural experiments showed that these expansions were driven by within-population  
29 diversification of individual oviposition preferences. These results may explain an old puzzle: a  
30 significant negative association between population-level diet breadth and mtDNA diversity.  
31 Populations with fewer mtDNA haplotypes had broader diets, suggesting that diet breadth  
32 increases in younger, recently-colonized populations.

33

34 A recent global meta-analysis of butterfly diets, using biogeographic data, explains latitudinal  
35 patterns of diet breadth by showing that poleward range expansions have caused reduced  
36 specialization. This implies broad applicability of our results, which provide a plausible  
37 mechanism for the latitudinal trends: colonizations at expanding range margins would increase  
38 population-level diet breadths, while population persistence in range interiors would facilitate  
39 increasing specialization.

40

41 **Subject terms:** specialization, generalization, extinction-colonization dynamics, climate change,  
42 diet breadth, range expansion, diet evolution, insect diet, host shift, oviposition preference,  
43 *Euphydryas*

44

45 Evolution along a specialist-generalist axis has both practical and conceptual  
46 significance<sup>1-3</sup>, and herbivorous insects have figured prominently in studies of diet breadth  
47 evolution. Phylogenetic analyses have tested the plausible hypothesis that specialists are derived  
48 from generalists more frequently than evolution in the opposite direction. The hypothesis was not  
49 well supported<sup>4,5</sup>; evidently diet breadth evolves readily in either direction. The idea that this  
50 bidirectional evolvability causes oscillations between specialization and generalization, and that  
51 these oscillations have acted as important drivers of insect speciation and biodiversity first  
52 emerged from analyses of the butterfly family Nymphalidae<sup>5,6</sup>. This idea has stimulated lively  
53 and apparently unresolved debate<sup>7-11</sup>.

54 Hardy<sup>9</sup> asks “does experimental adaptation of a plant-eating insect population to a novel  
55 host result in host-use generalism, and improve the odds of evolving additional new host  
56 associations?” Braga et al.<sup>12</sup> use an experiment “in silico” to answer this question in the  
57 affirmative. Here we answer it “in vivo,” applying a combination of observation and experiment  
58 to a single butterfly species, Edith’s checkerspot (*Euphydryas editha*), and showing that habitat  
59 colonizations were followed by diversification of individual host preferences and increases of  
60 population-level diet breadth.

61 Meta-analysis produces the generalization that mean diet breadth of insects increases  
62 with latitude<sup>13,14</sup>. As in other taxa<sup>14</sup>, temperate zone insects tend to be less specialized than those  
63 from equatorial climes. A possible reason is that generalists have been better colonists, quicker  
64 to extend their ranges polewards as glaciations receded. Using a global analysis of butterfly  
65 diets, distributions, and range dynamics, Lancaster<sup>14</sup> builds a case for the opposite cause and  
66 effect: that the process of range expansion itself has generated the broader diets observed at  
67 higher latitudes. Here, we show that, in our study insects, the fine-scale mechanics of diet-  
68 breadth dynamics generate an expectation of the global patterns that Lancaster documents. As  
69 range shifts caused by climate warming increase in both pace and prevalence<sup>15</sup>, the combination  
70 of our behavioural study with Lancaster's global meta-analysis will help understand changes of  
71 niche breadth that occur within these shifting ranges.

72

### 73 *Study system*

74 Edith’s checkerspot butterfly (*Euphydryas editha*; Nymphalidae, Melitaeinae), uses  
75 different host genera in a geographic mosaic across its range<sup>16-18</sup>. Adults lay eggs in clutches on

76 hosts in the Orobanchaceae (*Pedicularis*, *Castilleja*) and Plantaginaceae (*Collinsia*, *Plantago*,  
77 *Penstemon*, *Veronica*, *Mimulus*, *Antirrhinum*). When the proportion of *E. editha* eggs laid on  
78 each host was ascertained by census at each of 57 sites, 43 populations were recorded as  
79 monophagous, with the remainder using two to four host genera<sup>17</sup>. These populations showed  
80 strong isolation by distance but no isolation by host, so they did not comprise a set of host-  
81 associated cryptic species<sup>19</sup>.

82

### 83 *Relationship between population-level diets and host preferences of individual females*

84 Because female *E. editha* behave naturally in staged encounters with potential hosts, an  
85 experimenter can assess oviposition preferences by arranging a sequence of such encounters<sup>20-25</sup>.  
86 Use of this behavioural assay has shown that, in populations of *E. editha* that used more than one  
87 host, this diversity of diet could be achieved either by weakness of oviposition preference  
88 (allowing butterflies to accept hosts that they did not prefer), and/or by diversity of preference  
89 rank within the population<sup>20-22</sup>. Diversity of rank was an important source of diet variation within  
90 two populations where diet was rapidly-evolving, while weakness of preference was the  
91 principal mechanism in 6 populations that were not currently indulging in bouts of diet  
92 evolution<sup>22</sup>.

93

### 94 *Variation within and among host populations and species: can a host shift be intraspecific?*

95 Preference tests performed on *E. editha* and two closely-related Melitaeine species,  
96 *Melitaea cinxia* and *Euphydryas aurinia*, examined butterfly responses to variation among host  
97 individuals, populations and genera. From the perspectives of all three butterfly species,  
98 variation of acceptability among host individuals or conspecific populations can be equivalent in  
99 magnitude to variation among host genera<sup>23-25</sup> (See Glossary for definitions of “preference” and  
100 “acceptability” and supplemental Text 1 for experiments). Because variation among host  
101 populations is so important to Melitaeines, it may often be the case that a colonizing female is  
102 effectively undertaking a host shift even if the host she uses after migrating is the species on  
103 which she developed at her site of origin. Host shifts may be much more frequent from the  
104 butterflies’ perspective than they appear to a human observer who classifies hosts by species.

105

106

107 **Results**

108

109 *Long-term observations*

110

111 Distributions of *E. editha* eggs and young (pre-dispersal) larvae on their hosts were recorded in  
112 the 1970's/1980's and again more recently in 15 populations/metapopulations distributed across  
113 California. Figure 1 shows the locations and diets of 14 of these populations and Figure 2 shows  
114 time-trends of diet breadth across decades at all 15 sites. Supplemental Table 1 complements  
115 Figure 2, giving recorded diet breadths at first and last census in each site. As the Figure shows,  
116 seven populations had the same diet breadth in the most recent census as in the 1980's, while  
117 eight had narrower diets. None had broader diets. A two-tailed binomial test rejects the  
118 hypothesis that diet breadth was equally likely to have expanded or contracted ( $p = 0.008$ ).  
119 Within our set of study populations, there has been a general trend for diet breadth to be reduced  
120 over time (caveats in supplemental text 2).

121

122

**Figure 1. Map of study sites, with diets in 1980's**

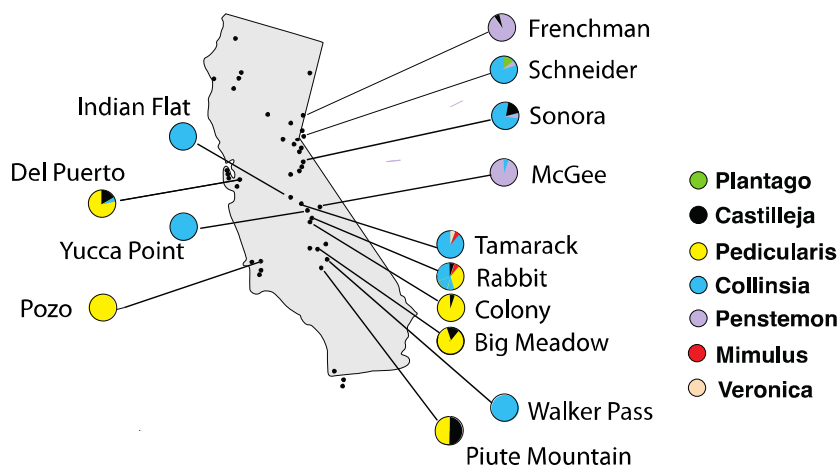

123

124



126  
127  
128  
129  
130

**Figure 2. Changes of *E. editha* diet breadth across decades.**

Extinction/recolonization events numbered by each skull and crossbones:  
1 = Rabbit Meadow, 2 = Walker Pass, 3 = Sonora Junction, 4 = Schneider's Meadow.

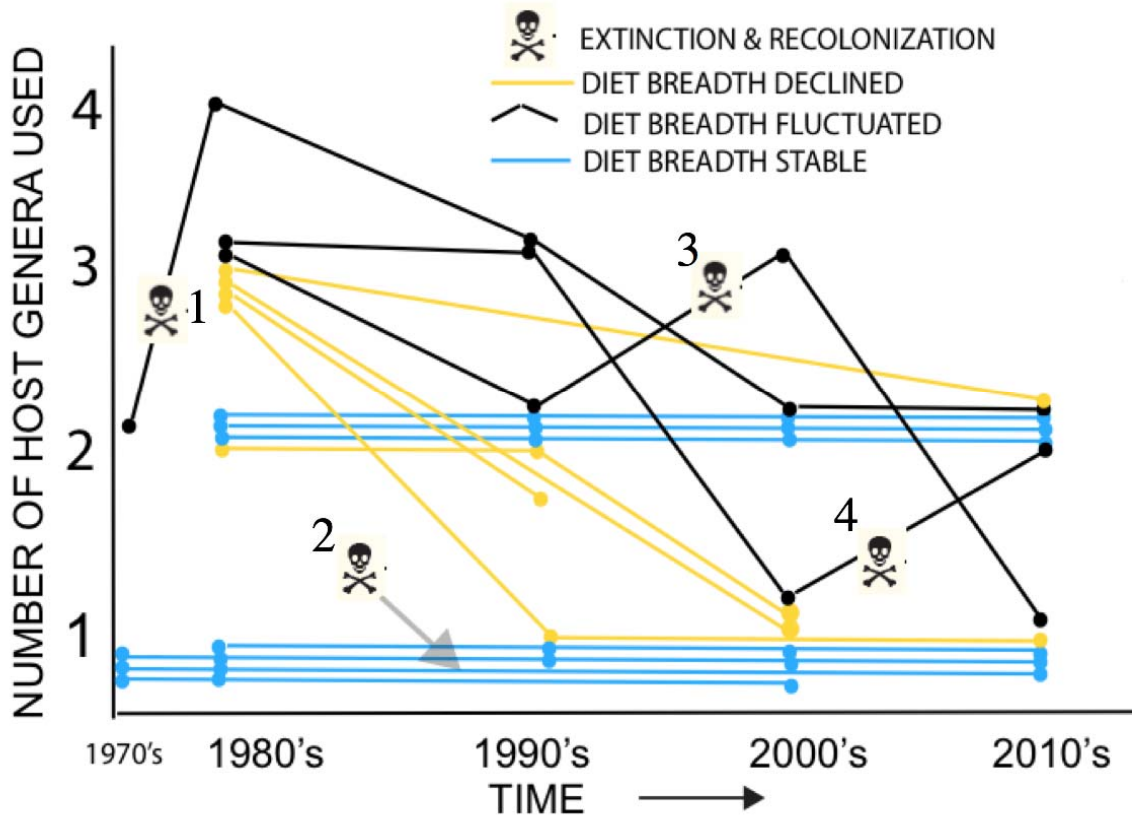

131  
132

### 133 *Diet breadth and preference diversity following colonizations*

134

135 Figure 2 shows extinction/recolonization events at four sites. At Walker Pass only one host was  
136 present and the insects unsurprisingly remained monophagous after recolonization. At Schneider  
137 a detailed history of diet evolution from 1982-2007 is published<sup>26</sup> but the apparent diet expansion  
138 from one host genus in the 2000s to two after recolonization in the 2010s (Figure 2) depends on a  
139 single oviposition<sup>26</sup> so we shall not discuss it further. At the remaining two sites, Sonora and  
140 Rabbit, extinction/recolonization events were clearly followed by broadening of population-level  
141 diet driven mechanistically by temporary diversification of oviposition preference ranks. We  
142 describe these events in detail below.

143  
144  
145  
146  
147  
148  
149  
150  
151  
152  
153  
154  
155  
156  
157  
158  
159  
160  
161  
162  
163  
164  
165  
166  
167  
168  
169  
170  
171  
172  
173

Sonora: extinction/colonization, diversification of preference ranks and expansion of diet breadth

At Sonora in the 1980's *E. editha* used three hosts, two of them frequently (*Castilleja*, *Collinsia*) and one (*Penstemon*) rarely in the 1980s but not at all in the 1990s (Black line number 3 in Figure 2). Host preference ranks were almost invariant; we found a single exception to the rule that butterflies either ranked *Castilleja*>*Collinsia*>*Penstemon* or they showed no preference<sup>22,23</sup>. In 1986 the top-ranked host, *Castilleja*, received an estimated 24% of the eggs laid, with *Collinsia* receiving 76%<sup>21</sup>. *Castilleja* was sufficiently rare that most insects failed to find it before reaching the oviposition motivation at which they would accept either *Castilleja* or *Collinsia*, whichever they encountered next. They were then more likely to encounter the more abundant host, *Collinsia*. The principal mechanism by which the population used more than one host was the combination of weakness of preference with rarity of the most-preferred plant<sup>21</sup>.

A natural extinction in the late 1990s, was followed by natural recolonization in 2000-2001, after which preference ranks in 2002 were suddenly diverse (Table 1, Figure 3). We found all possible rank orders for the three hosts, any one of which could be ranked at either the top or the bottom of the preference hierarchy. As expected from these preferences, population-level diet breadth had increased: all three hosts were substantially used in 2002 and the most-used host was *Penstemon*, which had previously been both the least-used and least-preferred of the three (Supplemental text 3).

By 2014/2018, with the exception of two butterflies that preferred *Collinsia* over *Penstemon*, preferences at Sonora had reverted to their original homogeneous ranking of *Castilleja*>*Collinsia*>*Penstemon* (Table 1, Figure 3). *Penstemon* had once again disappeared from the diet; despite intensive censuses, in neither 2014 nor 2018 did we find a single oviposition on this host. This was not surprising given that, out of 50 females tested, none preferred *Penstemon* over *Castilleja* and only one failed to discriminate between these hosts. Both the diversification of preferences and the inclusion of *Penstemon* into the diet as a major host had been ephemeral, appearing rapidly following the recolonization event, then disappearing within a dozen generations.



174 Figure 3. Proportions of butterflies preferring *Castilleja* or *Penstemon* at Sonora before and after  
 175 natural extinction and recolonization. (additional data in Table 2).

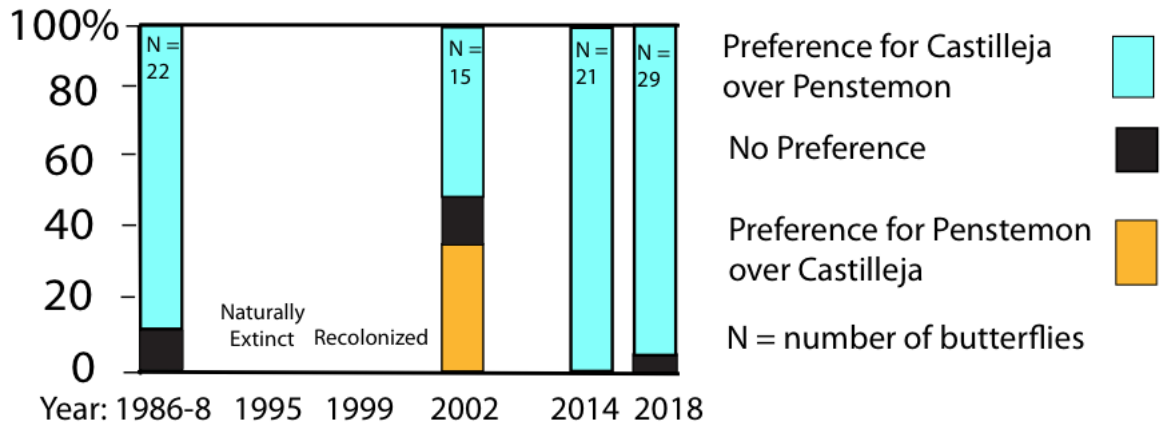

176

177

178 Table 1: Preference ranks at Sonora Junction before and after natural extinction and  
 179 recolonization.

180

|                                            |                   | <<<<Prefer<br>plant named<br>at left | No<br>preference | Prefer>>>><br>plant named<br>at right |                  |
|--------------------------------------------|-------------------|--------------------------------------|------------------|---------------------------------------|------------------|
| <b>1986-88</b>                             | <b>Castilleja</b> | <b>20</b>                            | <b>2</b>         | <b>0</b>                              | <b>Penstemon</b> |
| <b>1986-88</b>                             | <b>Castilleja</b> | <b>13</b>                            | <b>9</b>         | <b>0</b>                              | <b>Collinsia</b> |
| <b>1986-88</b>                             | <b>Collinsia</b>  | <b>43</b>                            | <b>3</b>         | <b>1</b>                              | <b>Penstemon</b> |
| <b>Extinction &amp;<br/>Recolonization</b> |                   |                                      |                  |                                       |                  |
| <b>2002</b>                                | <b>Castilleja</b> | <b>7</b>                             | <b>2</b>         | <b>6</b>                              | <b>Penstemon</b> |
| <b>2002</b>                                | <b>Castilleja</b> | <b>5</b>                             | <b>5</b>         | <b>5</b>                              | <b>Collinsia</b> |
| <b>2002</b>                                | <b>Collinsia</b>  | <b>12</b>                            | <b>2</b>         | <b>10</b>                             | <b>Penstemon</b> |
|                                            |                   |                                      |                  |                                       |                  |
| <b>2014</b>                                | <b>Castilleja</b> | <b>21</b>                            | <b>0</b>         | <b>0</b>                              | <b>Penstemon</b> |
| <b>2014</b>                                | <b>Castilleja</b> | <b>21</b>                            | <b>0</b>         | <b>0</b>                              | <b>Collinsia</b> |
| <b>2014</b>                                | <b>Collinsia</b>  | <b>13</b>                            | <b>5</b>         | <b>0</b>                              | <b>Penstemon</b> |
|                                            |                   |                                      |                  |                                       |                  |
| <b>2018</b>                                | <b>Castilleja</b> | <b>28</b>                            | <b>1</b>         | <b>0</b>                              | <b>Penstemon</b> |
| <b>2018</b>                                | <b>Castilleja</b> | <b>29</b>                            | <b>1</b>         | <b>0</b>                              | <b>Collinsia</b> |
| <b>2018</b>                                | <b>Collinsia</b>  | <b>18</b>                            | <b>5</b>         | <b>2</b>                              | <b>Penstemon</b> |

181

182 Data from 1986-8 are from references 21 and 23; data from 2002, 2014 & 2018 are unpublished.

183

184 Site: Rabbit: two episodes of diversification of diet and preference: one adaptive, the other  
185 nonadaptive.

186

187 Prior to human intervention, the *E. editha* metapopulation in the Rabbit metapopulation  
188 (Fig. 1) used two perennial hosts and occupied >20 habitat patches distributed across 8 x 10  
189 km<sup>27</sup>. The principal diet was *Pedicularis*, with minor use of the much rarer *Castilleja*<sup>28</sup>. A third  
190 potential host, the annual *Collinsia*, was abundant but not used. Natural selection opposed using  
191 *Collinsia* because its lifespan was so short at this site that larvae hatching from eggs laid on it  
192 were almost certain to starve after host senescence<sup>18</sup>.

193 Between 1967 and 1978, humans made 18 clearings in which all trees were removed,  
194 fires were set and ground was bulldozed, locally extirpating the butterflies from the cleared  
195 areas. Fertilization effect from the fires extended the size and lifespan of *Collinsia* to the point  
196 where they could accommodate the life cycle of the butterflies. *Collinsia* in clearings suddenly  
197 became a benign environment for the larvae, supporting higher fitness than the well-defended  
198 *Pedicularis*, despite the butterflies being adapted to *Pedicularis* and demonstrably maladapted to  
199 *Collinsia* in a suite of six host-adaptive traits<sup>28</sup>.

200 By the mid-1980s all the larger clearings had been colonized by butterflies immigrating  
201 from adjacent unlogged patches, where the insects had persisted on their original diet of  
202 *Pedicularis*. In one such clearing a detailed census and map was made of the distribution and  
203 host affiliations of *E. editha* oviposition<sup>20</sup>. Eggs had been laid on four hosts: two novel hosts,  
204 *Collinsia* and *Mimulus*, plus the two traditional hosts, *Pedicularis* and *Castilleja*. *Pedicularis* is  
205 a hemiparasite of gymnosperms, killed by logging, so just a few individuals had entered the  
206 clearing at its margins. *Collinsia* and *Mimulus* were used in the centre of the clearing but  
207 remained unused in the adjacent unlogged patch, where both occurred and *Collinsia* was  
208 abundant. This pattern of host use sets the context for the two cases of preference diversification  
209 that occurred in the clearing and that are detailed below.

210

211 Case 1: adaptive diversification of preference as part of host shift from *Pedicularis* to *Collinsia*

212

213 Butterflies in Sequoia National Park (12 km from Rabbit) represent the putative pre-

214 logging state of the Rabbit population. Here, we found no diversity of preference rank; most  
215 butterflies from the Park showed varying strengths of preference for *Pedicularis* over *Collinsia*  
216 and a few showed no preference, but none preferred *Collinsia* over *Pedicularis*<sup>27</sup>.

217 In contrast, preference ranks for the same two hosts in the anthropogenically altered  
218 Rabbit clearing were diverse and evolving through the 1980s. In the early 1980s most insects  
219 emerging in the centre of the clearing preferred to oviposit on *Pedicularis*, despite having  
220 developed on *Collinsia* from eggs naturally laid on it. The proportion of these butterflies that  
221 preferred *Collinsia* increased significantly between 1984 and 1989<sup>27</sup>.

222 This change, and the diversification of preference from the starting condition lacking  
223 diversity of preference rank was measured in the field but also reflected in laboratory-raised  
224 butterflies. It is consistent with adaptive evolutionary response to measured natural selection that  
225 favoured preference for *Collinsia*, but acted on an initially *Pedicularis*-preferring population<sup>28</sup>.

226

227 Case 2: non-adaptive preference diversification: incorporation of *Mimulus* into the diet as a side-  
228 effect of host shift to *Collinsia*.

229

230 In the ancestral state *Mimulus* and *Collinsia* were present but neither was used for  
231 oviposition, though *Collinsia* was fed upon by wandering late-instar larvae. By the early 1980s  
232 both plants were hosts in the clearing<sup>20</sup> (Table 2A) and oviposition preferences for them were  
233 diverse (Table 2B). Field experiments<sup>22</sup> estimated that selection in the clearing favoured  
234 oviposition on *Collinsia* over that on *Mimulus*, so *Mimulus* had been included in the diet in the  
235 absence of natural selection favouring this addition (*Mimulus* is “host 4” in Fig 2 of reference  
236 22). By the late 1980s preferences for *Collinsia* over *Mimulus* had become homogeneous and  
237 *Mimulus* was no longer used (Tables 2A, B). These preferences were still homogeneous in  
238 butterflies sampled from undisturbed patches in 2019, 17 years after both *Collinsia* and the  
239 clearing patches had been abandoned and the insects had reverted to their traditional diet of  
240 *Pedicularis* in the un-cleared patches<sup>28</sup>.

241

242

243 Table 2A: Egg distributions on *Collinsia* and *Mimulus* in Rabbit clearing and adjacent unlogged  
 244 patch. \* indicates that no census was done

245

| <b>year</b> | <b>Habitat: clearing patch</b>                        | <b>Habitat: clearing patch</b>                    | <b>Habitat: unlogged patch</b>                        | <b>Habitat: unlogged patch</b>                    |
|-------------|-------------------------------------------------------|---------------------------------------------------|-------------------------------------------------------|---------------------------------------------------|
|             | <b>Clutches on <i>Collinsia</i>/quadrats searched</b> | <b>Clutches on <i>Mimulus</i>/plants searched</b> | <b>Clutches on <i>Collinsia</i>/quadrats searched</b> | <b>Clutches on <i>Mimulus</i>/plants searched</b> |
| <b>1979</b> | <b>16/41</b>                                          | <b>*</b>                                          | <b>0/22</b>                                           | <b>*</b>                                          |
| <b>1981</b> | <b>5/33</b>                                           | <b>6/25</b>                                       | <b>0/50</b>                                           | <b>0/32</b>                                       |
| <b>1982</b> | <b>37/118</b>                                         | <b>13/36</b>                                      | <b>0/56</b>                                           | <b>0/46</b>                                       |
|             |                                                       |                                                   |                                                       |                                                   |
| <b>1988</b> | <b>*</b>                                              | <b>0/47</b>                                       | <b>*</b>                                              | <b>*</b>                                          |
| <b>1989</b> | <b>9/69</b>                                           | <b>0/37</b>                                       | <b>*</b>                                              | <b>*</b>                                          |
| <b>1991</b> | <b>19/54</b>                                          | <b>0/18</b>                                       | <b>*</b>                                              | <b>*</b>                                          |
| <b>2019</b> | <b>0/40</b>                                           | <b>0/66</b>                                       | <b>0/40</b>                                           | <b>0/51</b>                                       |

246  
 247 Table 2B: Preferences for *Collinsia* vs *Mimulus* in Rabbit Meadow clearing after its colonization  
 248 in the 1970's.

249

| <b>year</b> | <b>Butterflies preferring <i>Collinsia</i></b> | <b>No preference</b> | <b>Butterflies preferring <i>Mimulus</i></b> |
|-------------|------------------------------------------------|----------------------|----------------------------------------------|
| <b>1981</b> | <b>1</b>                                       | <b>8</b>             | <b>4</b>                                     |
| <b>1982</b> | <b>10</b>                                      | <b>5</b>             | <b>4</b>                                     |
|             |                                                |                      |                                              |
| <b>1988</b> | <b>14</b>                                      | <b>2</b>             | <b>0</b>                                     |
| <b>1992</b> | <b>9</b>                                       | <b>1</b>             | <b>0</b>                                     |
| <b>2019</b> | <b>20</b>                                      | <b>0</b>             | <b>0</b>                                     |

250  
 251 Site: Schneider:

252  
 253 The traditional diet of *E. editha* at Schneider (Carson City, Nevada, Fig 1) can be  
 254 deduced from that of the closest known population of the same ecotype, at Simee Dimeh  
 255 Summit. After fire had caused a brief population explosion of *E. editha* at Simee Dimeh in 2013,  
 256 we recorded >100 egg clusters on *Collinsia* and none on the only other potential host present,  
 257 *Penstemon*, despite intensive search. Therefore, our estimate of the starting condition at  
 258 Schneider is monophagy on *Collinsia*. The same conclusion was drawn by Thomas et al<sup>29</sup> from

259 the diet of the closest population to Schneider that was then known, at Curtz Lake.

260 By 1969 the European exotic *Plantago lanceolata* had already been incorporated into the  
261 diet alongside *Collinsia*<sup>26</sup>. We began detailed censuses in the early 1980's, when three hosts  
262 were used: *Collinsia*, *Plantago* and *Penstemon*. Oviposition preferences were diverse, heritable,  
263 and expressed in nature: butterflies captured in the act of oviposition tended to prefer, in  
264 preference trials, the host species they had chosen naturally<sup>30</sup>.

265 From 1982 onwards the population evolved from majority use of *Collinsia* towards  
266 increasing use of *Plantago*. By 2005-7 oviposition preferences were invariant, with butterflies  
267 unanimously preferring *Plantago* over *Collinsia*. Both *Collinsia* and *Penstemon* had been  
268 abandoned. In 2008, the population became extinct in response to a change in land management.  
269 In 2013-4 the site was recolonized by *E. editha* adapted to *Collinsia*, on which the new  
270 population was initially monophagous<sup>26</sup>.

271 How does this history fit our scenarios? As at Rabbit, preference tests performed on  
272 butterflies in the presumed ancestral condition at Curtz Lake found no diversity of preference  
273 rank; butterflies either preferred *Collinsia* over *Plantago* or showed no preference<sup>32,33</sup>. We  
274 attribute to natural selection the appearance of preference rank diversity for these two hosts at  
275 Schneider in the 1980s and the disappearance of *Collinsia* preference in 2005-7 as the population  
276 became monophagous on *Plantago*<sup>26</sup>. It's possible that *Penstemon* was temporarily included in  
277 the diet as a nonadaptive side-effect of the host shift to *Plantago*, in a manner similar to the  
278 temporary inclusion of *Mimulus* at Rabbit Meadow.

279 After recolonization in 2013-4 the population reverted to monophagy on *Collinsia*, failing  
280 to exhibit our expected diet breadth expansion<sup>26</sup>. In 2018 we found only two ovipositions, which  
281 were on different hosts (Table 1) but we draw no conclusion from this sample.

282  
283 *mtDNA and diet breadth*

284  
285 In the 1980s, while diet breadth censuses were being done, a separate set of samples was taken  
286 for mtDNA analysis, independently of the diet censuses, from 24 (meta)populations of *E.*  
287 *editha*<sup>31</sup>. We here address a question that the original study<sup>31</sup> did not ask. We test the null  
288 hypothesis of no association between genetic diversity and diet breadth. To do this, we need to  
289 allow for variation of sample sizes in the genetic study. Accordingly, we derived a sample-size-

290 independent estimate of mtDNA diversity as the number of haplotypes per individual sampled  
291 (Supplemental Table 1, right hand column). The association between this statistic and the diet  
292 breadths illustrated in Figure 2 and listed in column 2 of Supplemental Table 1 is significant with  
293  $p = 0.024$ , by Spearman rank test (two-tailed). As Figure 4 suggests, samples from populations  
294 using fewer host genera contained significantly more mtDNA haplotypes.

295 Because sample sizes were diverse, the association shown in Figure 4 might have  
296 stemmed from sampling more individuals from populations that happened to be monophagous  
297 than from those with broader diets. However, the opposite was the case: a regression of mtDNA  
298 sample sizes on diet breadth, using the data in Table 1, gives a slope of  $+3.6$  ( $P = 0.06$ , two-  
299 tailed). The direction of this trend, with higher mtDNA sample sizes from populations with  
300 broader diets, is opposite to that expected to produce the relationship in Figure 4.

301

302 Figure 4. Numbers of mtDNA haplotypes found in the 14 study populations of *E. editha* plotted  
303 against the 1980's diet breadths shown in Figures 1 & 2 and supplemental Table 1.

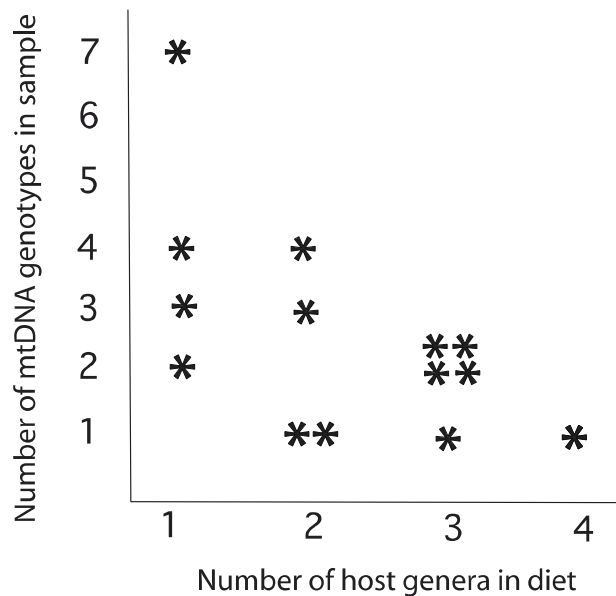

304

305

## 306 Discussion

307

308 Much of the literature that ties insect diet evolution to generation of biodiversity carries  
309 the assumption that host shifts facilitate speciation. In Melitaeine butterflies this does not seem  
310 to be true. Host shifts are frequent, closely-related sympatric species typically have overlapping  
311 diets<sup>31</sup>, and *E. editha* itself shows strong isolation by distance but no residual isolation by host<sup>19</sup>.  
312 The failure of Melitaeines to speciate with host shifts may reflect the fact that they don't mate on  
313 their hosts. Apart from this trait, we have no reason to think that diet evolution in Melitaeines is  
314 unusual, so we expect its mechanisms, as revealed in the current study, to be informative about  
315 processes that operate more widely than in this butterfly subfamily. Whether the short-term  
316 changes we show are informative about long-term diet breadth oscillations that occur across  
317 millennia<sup>5-12</sup> is an open question, but the fact that insects tend to recolonize long-lost ancestral  
318 diets suggests that processes measured on very different time scales are related.

319

### 320 Causes of preference diversification

321

322 The first cause of preference diversity that we show is natural selection driving a shift  
323 from monophagy on one host towards monophagy on another. We note two previously-published  
324 examples from our own work: the generation, during independent host shifts at Rabbit and  
325 Schneider, of novel diversity of preference ranks from starting points lacking such diversity. At  
326 Schneider we saw this preference diversity appear, persist for >8 years, and then disappear as the  
327 insects evolved to monophagy on their novel host<sup>26</sup>. At Rabbit the host shift did not proceed this  
328 far. Prior to the metapopulation achieving monophagy on the novel host, the direction of natural  
329 selection, and hence the direction of evolution, was reversed, the butterfly populations in the  
330 patches using the novel host were extirpated, and the system reverted to its starting point<sup>28</sup>.

331 The second cause of preference diversity, as a nonadaptive consequence of colonization  
332 events, is less expected and not previously published. Our clearest example is the ephemeral  
333 inclusion at Rabbit of the unsuitable novel host, *Mimulus*, immediately following the adoption of  
334 the suitable novel host, *Collinsia*. The temporary addition of *Penstemon* to the diet at Schneider,  
335 during the host shift from monophagy on *Collinsia* to monophagy on *Plantago*, is likely to reflect  
336 the same process.

337 Our results do not apply universally. Two unrelated studies have shown increased dietary

338 specialization after colonization. First, Hardy et al<sup>34</sup> use phylogenetic analyses to argue that, in  
339 scale insects, diet diversity is positively associated with genetic diversity (the opposite of our  
340 own finding), so founder effects associated with colonizations and range expansions have caused  
341 population-level diet to become more specialized, not less.

342 The second study with a result contrary to ours is from a butterfly, the Brown Argus,  
343 which, like many other species, is indulging in a poleward range expansion attributed to regional  
344 climate warming. This expansion is associated with increasing host specialization in England.  
345 Oviposition preferences were more specialized and homogeneous, both within and among  
346 populations, in the expanding parts of the range than in long-established populations<sup>35</sup>. In  
347 addition, larvae in the expanding regions were physiologically more host-specialized and had  
348 lost evolvability, compared to their ancestral populations<sup>36</sup>. These two contrary results give us  
349 pause in suggesting the level of generality of our results.

350 However, we regain some confidence because, if even moderately general, the  
351 phenomena we document could underpin the broad geographic pattern of diet breadth with  
352 decreasing specialization at higher latitudes<sup>13</sup>. Using a global database of diet observations and  
353 geographic distributions of Lepidopteran species, Lancaster<sup>14</sup> concludes that the principal cause  
354 of this latitudinal trend is that range expansions cause loss of population-level specialization  
355 rather than that generalists make better colonists. Our studies of *E. editha* support this  
356 interpretation and further suggest that population-level generalization in the biogeographic data  
357 may often represent diversification of specialists rather than (or in addition to) loss of  
358 specialization at the individual level.

359

#### 360 Cause of the negative association between mtDNA and diet breadth

361 What are possible causes of the negative association that we find between genetic  
362 diversity and diet breadth? If gene flow and admixture were the main driver of variable diet  
363 breadth, populations with broader diets would be those that had received more diverse gene flow,  
364 so they should show more, rather than less, genetic variation – opposite to our findings. On the  
365 other hand, the observed relationship could be explained if both were functions of population  
366 age: that is, if young populations had both lower genetic diversity and broader diets than long-  
367 established populations.



368 Newly-founded populations are, indeed, expected to have reduced genetic diversity and  
369 to acquire more genotypes as they age, from some combination of immigration and mutation<sup>32,33</sup>.  
370 However, it is not obvious that recently-colonized populations should have broader diets than the  
371 sources from which they were derived. Indeed, the opposite relationship can occur. If diet  
372 breadth of a source population reflects diversity of individuals with different host adaptations, we  
373 expect “specialization by drift”<sup>34</sup>; founder effects should reduce diet breadths at newly-colonized  
374 sites, compared to their sources.

375 One possible mechanism to generate increase in diet breadth after colonizations would be  
376 that colonization events were followed by host shifts, and additional hosts were added to the diet  
377 during evolutionary transitions from traditional to novel hosts, as suggested by Hardy<sup>9</sup>. A model  
378 of parasite evolution in the context of a fitness landscape with heterogeneous hosts does, indeed,  
379 generate this scenario<sup>12</sup>.

380 Colonizing females are unlikely to actively switch host species with high enough  
381 frequency to produce the association in Figure 4. However, if, as we have suggested (above and  
382 in supplemental text 1), each host population were effectively unique from the butterflies’  
383 perspective, then adapting to a newly-colonized population of a traditional host species might  
384 require sufficient change of host preference that additional host species were temporarily drawn  
385 into the diet. In this case, an explanation of the diet breadth/mtDNA relationship on the basis of  
386 colonizations, host shifts and population age becomes less unlikely (see supplemental text 1).

387

### 388 Conclusion

389 As more and more species track shifting climate spaces driven by current warming  
390 trends, the numbers experiencing poleward range expansions will continue to rise. Yet we have  
391 little understanding of the behavioural and evolutionary processes accompanying these  
392 ecological range expansions. The mechanisms driving diet expansion and contraction that we  
393 document here may help us to better understand these underlying dynamics, thereby informing  
394 projection models and conservation planning under continued anthropogenic climate change.

395

396

397 **References**

398

399 1. Futuyma, D. J., & Moreno, G. The evolution of ecological specialization. *Annual Review of*  
400 *Ecology and Systematics* **19**, 207–233 (1988).

401 2. Cullingham, C. J., Cooke J. E. K., Dang, S., Davis, C. S., Cooke, B. J., & Coltman D. W.  
402 Mountain pine beetle range expansion threatens the boreal forest. *Molecular Ecology* **20**, 2157-  
403 2171 (2011).

404 3. Forister, M. L., Dyer, L. A., Singer, M. S., Stireman, J. O., & Lill, J. T. Revisiting the  
405 evolution of ecological specialization, with emphasis on insect-plant interactions. *Ecology* **93**,  
406 981-991 (2012).

407 4. Nosil, P. Transition rates between specialization and generalization in phytophagous insects.  
408 *Evolution* **56**, 1701-1706 (2002).

409

410 5. Janz N., Nylin, S., & Nyblom, K. Evolutionary dynamics of host plant specialization: a case  
411 study of the tribe Nymphalini. *Evolution* **55**, 783-796 (2001).

412

413 6. Janz, N., Nylin, S., & Wahlberg, N. Diversity begets diversity: host expansions and the  
414 diversity of plant-feeding insects. *BMC Evolutionary Biology* **6**, doi:10.1186/1471-2148-6-4  
415 (2006)

416

417 7. Janz, N., Braga, M. P., Wahlberg, N., & Nylin, S. On oscillations and flutterings – a reply to  
418 Hamm and Fordyce. *Evolution* **70**, 1150-1155 (2016).

419

420 8. Hamm C. A. & Fordyce, J. A. Greater host breadth still not associated with increased  
421 diversification rate in the Nymphalidae a response to Janz et al. *Evolution* **70**, 1156-1160 (2016).

422 9. Hardy, N. B. Do plant-eating insect lineages pass through phases of host-use generalism

423 during speciation and host-switching? Phylogenetic evidence. *Evolution* **71**, 2100-2109 (2017)

- 424 10. Nylin, S., Agosta, S., Bensch, S. et al. Embracing colonizations: a new paradigm for species  
425 association dynamics. *Trends in ecology and evolution* **33**, 4-14 (2018)  
426
- 427 11. Braga, M. P., Guimaraes P. R. Jr., Wheat, C. W., Nylin, S., & Janz, N. Unifying host-  
428 associated diversification processes using butterfly-plant networks. *Nature Communications* **9**,  
429 5155 | DOI: 10.1038/s41467-018-07677 (2018).  
430
- 431 12. Braga, M. P., Araujo SBL, Agosta S, Brooks D, Hoberg E, Nylin S, Janz N, & Boeger W. A.  
432 Host use dynamics in a heterogeneous fitness landscape generates oscillations in host range and  
433 diversification. *Evolution* **72**, DOI: 10.1111/evo13557 (2018)  
434
- 435 13. Forister, M. L., Novotny V., Panorska A. K. et al. The global distribution of diet breadth in  
436 insect herbivores. *PNAS* **112**, 442-447 (2015)  
437
- 438 14. Lancaster, L. T. Host use diversification during range shifts shapes global variation in  
439 lepidopteran dietary breadth. *Nature Ecology and Evolution* in press.  
440
- 441 15 Settele, J., Scholes, R., Betts, R., Bunn, S., Leadley, P., Nepstad, D., Overpeck, J. T. &  
442 Taboada, M. A., Terrestrial and inland water systems. In: Climate Change 2014: Impacts,  
443 Adaptation, and Vulnerability. Part A: *Global and Sectoral Aspects. Contribution of Working*  
444 *Group II to the Fifth Assessment Report of the Intergovernmental Panel on Climate Change*  
445 Cambridge University Press, Cambridge, United Kingdom and New York, NY, USA, pp. 271-  
446 359.  
447
- 448 16. Singer, M. C. Evolution of food-plant preference in the butterfly *Euphydryas editha*.  
449 *Evolution* **25**, 383- (1971).  
450
- 451 17. Singer, M. C. & Wee, B. Spatial pattern in checkerspot butterfly-hostplant association at  
452 local, metapopulation and regional scales. *Annales Zoologici Fennici* **42**, 347-361 (2005).
- 453 18. Singer M. C. & McBride, C. S. (2012) Geographic mosaics of species' association: a  
454 definition and an example driven by plant–insect phenological synchrony. *Ecology*, **93**, 2658-

455 2673.

456

457 19. Mikheyev A. S., McBride C. S., Mueller U. G., *et al.* Host-associated genomic  
458 differentiation in congeneric butterflies: now you see it, now you don't. *Molecular Ecology* **22**,  
459 4753-4766 (2013).

460

461 20. Singer, M. C. Determinants of multiple host use by a phytophagous insect population.  
462 *Evolution*, **37**, 389-403 (1983).

463

464 21. Singer M. C., Thomas, C. D., Billington, H. L., & Parmesan, C. Variation among conspecific  
465 insect populations in the mechanistic basis of diet breadth. *Animal Behaviour* **37**, 751–759  
466 (1989).

467

468 22. Singer, M. C., Thomas C. D., Billington, H. L., & Parmesan C. Correlates of speed of  
469 evolution of host preference in a set of twelve populations of the butterfly *Euphydryas editha*.  
470 *Ecoscience* **1**, 107-114 (1994).

471 23. Singer, M. C., & Parmesan, C. Sources of variation in patterns of plant-insect association.  
472 *Nature* **361**, 251-253 (1993).

473

474 24. Singer M. C., & Lee, J. R. Discrimination within and between host species by a butterfly:  
475 implications for design of preference experiments. *Ecology Letters* **3**, 101–105 (2000).

476

477 25. Singer, M. C., Stefanescu, C & Pen, I. When random sampling does not work: standard  
478 design falsely indicates maladaptive host preferences in a butterfly *Ecology Letters* **5**, 1-6 (2002)

479

480 26. Singer, M. C. & Parmesan, C. Lethal trap created by adaptive evolutionary response to an  
481 exotic resource. *Nature* **557**, 238+. (2018)

482

483 27. Singer M. C., Thomas, C. D. Evolutionary responses of a butterfly metapopulation to human  
484 and climate- caused environmental variation. *American Naturalist* **148**, S9-S39 (1996)

485

- 486 28. Singer, M. C. &, Parmesan, C. Butterflies raise fitness and colonize novel host by embracing  
487 maladaptation. *Evolutionary Applications*. <https://doi.org/10.1111/eva.12775> (2019).  
488
- 489 29. Thomas, C. D., Ng, D., Singer, M. C. Mallet J. L. B, Parmesan, C. & H. L. Billington.  
490 Incorporation of a European weed into the diet of a North American herbivore. *Evolution* **41**,  
491 892-901 (1987).  
492
- 493 30. Singer, M. C., Ng, D. & Thomas, C. D. Heritability of oviposition preference and its  
494 relationship to offspring performance in an insect population. *Evolution* **42**, 977-985 (1988)  
495
- 496 31. Radtkey, R. R. & Singer, M. C. Repeated reversals of host preference evolution in a  
497 specialist herbivore. *Evolution* **49**, 351-359 (1995).  
498
- 499 32. Austerlitz, F., Jung-Muller, B., Godelle, B. & Gouyon, P-H. Evolution of coalescence times,  
500 genetic diversity and structure during colonization. *Theor Pop Biol* **51**, 148-164 (1997)  
501
- 502 33. Excoffier L., Foll, M., & Petit, R. J. Genetic consequences of range expansions. *Annual*  
503 *Reviews of Ecology Evoution and Systematics* **40**, 481-501 (2009).  
504
- 505 34. Hardy, N. B., Peterson, D. A. & Normark, B. B. Nonadaptive radiation: pervasive diet  
506 specialization by drift in scale insects. *Evolution* **70**, 2421-2428 (2016).  
507
- 508 35. Bridle, J. R., Buckley, J., Bodsworth, E. J., & Thomas, C. D. Evolution on the move:  
509 specialization on widespread resources associated with rapid range expansion in response to  
510 climate change. *Proceedings of the Royal Society B*, **281**, 20131800 (2014).  
511
- 512 36. Buckley, J. & Bridle, J. R. Loss of adaptive variation during evolutionary responses to  
513 climate change. *Ecology Letters* **17**, 1316-1325 (2014).  
514
- 515 38. Singer, M. C. Reducing ambiguity in describing plant-insect interactions: "preference,"  
516 "acceptability" and "electivity." *Ecology Letters*, **3**, 159-162 (2000).

517

518 39. Singer, M. C., Vasco, D. A., Parmesan, C., Thomas, C. D. & Ng, D. Distinguishing between  
519 preference and motivation in food choice: an example from insect oviposition. *Animal*  
520 *Behaviour*, **44**, 463-471 (1992).

521

522 40. McNeely, C., Singer M. C. Contrasting the roles of learning in butterflies foraging for nectar  
523 and oviposition sites. *Animal Behaviour*, **61**, 847-852 (2001).

524

525 41. Singer, M. C., Wee, B., Hawkins, S. & Butcher, M. Rapid natural and anthropogenic diet  
526 evolution: three examples from checkerspot butterflies. Pp. 311–324 in K. J. Tilmon, ed. *The*  
527 *evolutionary ecology of herbivorous insects: speciation, specialization and radiation*. Univ. of  
528 California Press, Berkeley, CA. (2008)

529

530 Acknowledgements. Paul Ehrlich introduced MCS to *E. editha* in 1967; The U. S. National Park  
531 Service permitted work in Sequoia National Park; Chris Thomas, Helen Billington and David  
532 Ng, together with the authors, gathered data shown in Figure 1. Lesley Lancaster, Chris Thomas  
533 and Maud Charlery-Massiere critiqued the MS.

534

535 Reprint and permissions information is available at [www.nature.com/reprints](http://www.nature.com/reprints)

536

537 Correspondence and requests for materials should be addressed to

538 [michael.singer@plymouth.ac.uk](mailto:michael.singer@plymouth.ac.uk)

539

540 **Author Contributions.** Both authors participated in field censuses and writing. MCS performed  
541 oviposition preference tests and statistical analyses.

542

543 **Competing Financial interests.** The authors declare absence of competing financial interests.

544 GLOSSARY:

545 Population-level diet breadth: In the studies reported here, the number of host species on which  
546 eggs of *E. editha* were laid in a particular population.

547 Host use. Again, in the work reported here, the proportion of eggs laid on each host species by  
548 an insect or an insect population. In a practical sense, this must most often be measured from the  
549 distributions of silken webs spun by young larvae, although groups that do not survive to this  
550 stage are missed by this technique (see Methods).

551 Acceptance: a positive behavioural response by an insect to an encounter with a plant. It is a  
552 description of an observable and measurable event. It is not a trait of either plant or insect, since  
553 it depends on both insect preference and plant acceptability (see below). It is a trait of the plant-  
554 insect interaction<sup>38</sup>.

555 Insect preference: the set of likelihoods of accepting particular specified hosts that are  
556 encountered. Defined in this way, it is a property of the insect that can vary among individuals  
557 (Singer 2000) and can be heritable. *E. editha* first encounters hosts visually, then chemically,  
558 then physically, with separate preferences expressed at each stage<sup>31</sup>. Again in *E. editha*, the  
559 strength of post-alighting preference for two hosts, say host A and host B, is measured by the  
560 length of time that a female will search accepting only host B (if encountered) until, after failing  
561 to find host B, she reaches the level of oviposition motivation at which either A or B would be  
562 accepted, whichever is next encountered (details and justification in reference 39).

563 Plant acceptability. The set of likelihoods that a plant will be accepted by particular specified  
564 insects that encounter it. Defined in this way, it is a property of the host that can vary among  
565 individuals<sup>38</sup> and can be heritable<sup>23</sup>.

566  
567

568 **Methods**

569

570 MtDNA analyses: Reference 26 used 17 restriction endonucleases to identify 22 mtDNA  
571 haplotypes of *E. editha*, the distributions of which were recorded within and among 24  
572 populations or metapopulations of the butterfly, with metapopulations treated as single sites.  
573 These sites varied dramatically in their haplotype diversity. (Meta)populations with sample sizes  
574 of 11, 13, 17 and 30 each contained single haplotypes, while a sample of 14 individuals produced  
575 7 haplotypes and a sample of only four contained no replicates (Table 1). In order to retain this  
576 last small but informative sample we chose to include in our analysis all populations with  
577 mtDNA sample sizes of four or greater, thereby reducing the number of populations analyzed  
578 from 24 to 14.

579

580 Preference tests: Butterflies were captured in the field and their oviposition preferences tested by  
581 a standardized technique, in which encounters are staged between the tested insect and each plant  
582 in alternation. Plants were undisturbed in their natural habitats or freshly transplanted into pots  
583 in their own soil. Acceptance of plant taste was judged from full abdominal curling and extrusion  
584 of the ovipositor for 3 sec. Acceptance and rejection were recorded at each encounter, but  
585 oviposition was not allowed. Videos showing acceptance in such staged encounters are in Singer  
586 & Parmesan 2019. During each test the range of plants that would be accepted, if encountered,  
587 expands over time with increasing motivation to oviposit. Therefore, acceptance of plant A  
588 followed by rejection of plant B is recorded as preference for A over B. Testing of assumptions  
589 underlying this technique described in reference 32. Insects without preference are not shown in  
590 the Figure, so percentages do not sum to 100% except in 2005 & 2007, when preference for  
591 *Plantago* was unanimous among tested butterflies. Raw data are in Extended data table 3. A  
592 more detailed comparison between early and late periods, showing strengths as well as direction  
593 of preference, is given in Extended data Fig.8. The assumption that these insects' preferences are  
594 not influenced by prior experience, either as larvae or as adults, is supported by prior observation  
595 and experiment<sup>40</sup>.

596

597



598

599 Supplemental text 1.

600

601 Complex variation of host acceptability from the butterflies' perspective.

602

603 (1) *M. cinxia* were subjected to staged encounters with hosts during each of which they tasted the  
604 plant and could respond by attempting to oviposit (host acceptance) or by basking (host  
605 rejection). They were asked to rank three individual *Plantago lanceolata* and three *Veronica*  
606 *spicata* plants. Some individual butterflies consistently ranked these hosts taxonomically, either  
607 ranking all three *Plantagos* above all three *Veronicas* or vice versa. Other butterflies from the  
608 same populations were more impressed with chemical variation among individual hosts than  
609 between species, consistently producing rankings in which the two species were interdigitated<sup>24</sup>.

610

611 (2) *E. aurinia* produced different rankings of host genera, depending on which individual plants  
612 the butterflies were offered. This effect produced the false impression that insects from two  
613 monophagous populations, one using *Lonicera* and the other using *Cephalaria*, preferred to  
614 oviposit on *Succisa*, a plant that was not present in either of their habitats<sup>25</sup>.

615

616 (3) The choice by *E. editha* of different host species at two sites with similar vegetation was  
617 shown to be driven approximately equally by genetic variation in host acceptability between sites  
618 and by genetic variation in butterfly preference<sup>23</sup>.

619

620 Colonization and host shifts.

621

622 The studies summarized above all show that, from the butterflies' perspective, within-  
623 host-species variation can complement or even overwhelm variation between host genera. With  
624 this in mind, suppose that an emigrant from a population monophagous on *Penstemon rydbergii*  
625 colonizes a new habitat, where, given her initial host adaptations, the host that supports highest  
626 fitness is likewise *P. rydbergii*. However, the *Penstemon* population at the colonized site differs  
627 sufficiently in chemistry from the conspecifics at the source site, that the immigrant female  
628 perceives it just as differently as she would perceive a different host species. Colonizing what

629 appears to humans as the same host species would be, to the female, colonizing a different host  
630 entity, and this difference could drive diversification of preference and temporary taxonomic  
631 broadening of diet, pending natural selection causing a return to monophagy on *Penstemon*. This  
632 hypothetical scenario gains credibility since we have shown that heritable interpopulation  
633 variation in acceptability of *P. rydbergii* to *E. editha* was sufficient to cause the butterflies to use  
634 the *Penstemon* at one site but to drive them onto a different host genus (*Collinsia*) at another,  
635 where the *Penstemon* was less acceptable<sup>23</sup>.

636

637 Prior publication:

638

639 Some of the ideas presented here were foreshadowed in 2008<sup>41</sup>, including a verbal  
640 description of the relationship shown in Figure 2; but no data or analyses were provided at the  
641 time.

642

643

644

645

Supplemental Table 1: diet breadths in 2 time periods and mtDNA diversity in 1980s

| population         | Number of host genera in 1980 decade | Number of host genera at last check (decade) | Number of mtDNA haplotypes | Sample size for mt DNA study (individuals) | mtDNA haplotypes per individual sampled |
|--------------------|--------------------------------------|----------------------------------------------|----------------------------|--------------------------------------------|-----------------------------------------|
| Rabbit Meadow      | 4 <sup>20</sup>                      | 2 (2010)                                     | 1                          | 30                                         | 0.03                                    |
| Sonora Junction    | 3 <sup>22</sup>                      | 2 (2010)                                     | 2                          | 4                                          | 0.50                                    |
| Tamarack Ridge     | 3 <sup>22</sup>                      | 1 (2010)                                     | 2                          | 14                                         | 0.14                                    |
| Schneider's Meadow | 3 <sup>33</sup>                      | 2 (2010) <sup>33</sup>                       | 2                          | 7                                          | 0.29                                    |
| Del Puerto Canyon  | 3 <sup>22</sup>                      | 2 (1990)                                     | 2                          | 14                                         | 0.14                                    |
| Frenchman Lake     | 3 <sup>22</sup>                      | 2 (2010)                                     | 1                          | 13                                         | 0.08                                    |
| Tuolumne Meadow    | 3 <sup>22</sup>                      | 1 (2000)                                     | Not measured               | n/a                                        | n/a                                     |
| Piute Mountain     | 2 <sup>22</sup>                      | 2 (2010)                                     | 3                          | 10                                         | 0.33                                    |
| Colony Meadow      | 2                                    | 2 (2010)                                     | 1                          | 17                                         | 0.06                                    |
| McGee Creek        | 2                                    | 1 (2000)                                     | 1                          | 11                                         | 0.09                                    |
| Big Meadow         | 2 <sup>26</sup>                      | 2 (2010)                                     | 4                          | 19                                         | 0.21                                    |
| Yucca Point        | 1 <sup>26</sup>                      | 1 (2010)                                     | 3                          | 7                                          | 0.43                                    |
| Walker Pass        | 1 <sup>26</sup>                      | 1 (2010)                                     | 4                          | 4                                          | 1.00                                    |
| Indian Flat        | 1 <sup>22,26</sup>                   | 1 (2010)                                     | 7                          | 14                                         | 0.50                                    |
| Pozo               | 1 <sup>22,26</sup>                   | 1 (2000)                                     | 2                          | 6                                          | 0.33                                    |

646

647

648

649

650

Notes for Table 1: Reference 22 recorded only two hosts at Del Puerto, forgetting to include *Collinsia bartsiaefolia*, which had been not used since 1983. Where no reference is given, as is the case for most of the “last check” column, data are previously unpublished.

651

652

653

654

655

The three left-hand columns of the Table show population names, the numbers of host genera on which *E. editha* eggs or larval webs were found during the 1980's and the numbers of genera used in the most recent decade of observation, which, with four exceptions, is the current decade.

656 Supplemental text 2

657

658 We interpret the trend of decreasing diet breadth over time (Table 1) with caution, for two  
659 reasons. The first reason is that diet breadths recorded in the 1980s at two sites, Sonora and  
660 Frenchman, depend on single observations of natural egg clutches on the least-used hosts  
661 (*Penstemon* at Sonora and *Collinsia* at Frenchman). The second reason is that the broader 1980s  
662 diet at one site, Del Puerto Canyon, clearly reflected plasticity of the insects, which temporarily  
663 added *Collinsia* to their diet in 1983, when unusually high precipitation rendered this host  
664 phenologically suitable by extending its lifespan. *Collinsia* had not been not used at Del Puerto  
665 in our earliest observations, in 1969, so its absence from the diet in the most recent observation  
666 likely reflects its low acceptability, rather than increased specialization of the insects. Diet  
667 breadth at a second site, McGee, has also oscillated during our study, so the low diet breadth in  
668 the most recent observation may be coincidental. However, removal of both Del Puerto and  
669 McGee from the dataset does not eliminate significance of the trend for recent diets to be more  
670 narrow than those originally recorded, within continuously-occupied sites ( $p = 0.03$ ).

671

672 Since the mtDNA data in Figure 2 were compiled from long-outdated techniques, it  
673 would seem logical to re-sample the populations with better methodology. However, as Table 1  
674 shows, the diet breadth diversity that existed in the 1980s in our set of study populations has  
675 diminished and we longer have the necessary variation of diet breadth among these populations`  
676 to ask the question. If our thesis is correct, some of the new populations founded over the study  
677 period should have broader diets, and the mean population-level diet breadth that existed in the  
678 1980s may have been maintained across California. However, to ascertain this we would need to  
679 have performed systematic searches for newly-founded populations. We have not done this.  
680 Instead, our work has concentrated on the study sites that we first identified between 1968 and  
681 1992.

682 Together with the mitochondrial data, this evidence suggests that dietary breadth increases after  
683 colonization, then declines as a function of population age. These indirect sources of evidence  
684 are supported by direct observations of the process, presented below.

685

686           Supplemental text 3: At Sonora in 2002 we found 20 egg clutches on *Castilleja* in a total  
687 census of this rare plant; 9 on *Collinsia* in a census covering approximately 40% of  
688 phenologically-suitable plants and 14 on *Penstemon* in a census covering about 20% of these  
689 plants. From these data we estimate that the most-used host was *Penstemon*.  
690
